# Supplementary material for: PLAG1 and USF2 Co-regulate Expression of Musashi-2 in Human Hematopoietic Stem and Progenitor Cells
Source: PubMed Central journal article supplement (PMC5998603; doi:10.1016/j.stemcr.2018.03.006), 2018-04-10
Supplement: mmc1.pdf [file mmc1.pdf]

**Stem Cell Reports, Volume 10**

**Supplemental Information**

**PLAG1 and USF2 Co-regulate Expression of Musashi-2 in Human Hematopoietic Stem and Progenitor Cells**

**Muluken S. Belew, Sonam Bhatia, Ava Keyvani Chahi, Stefan Rentas, Jonathan S. Draper, and Kristin J. Hope**

# Figure S1

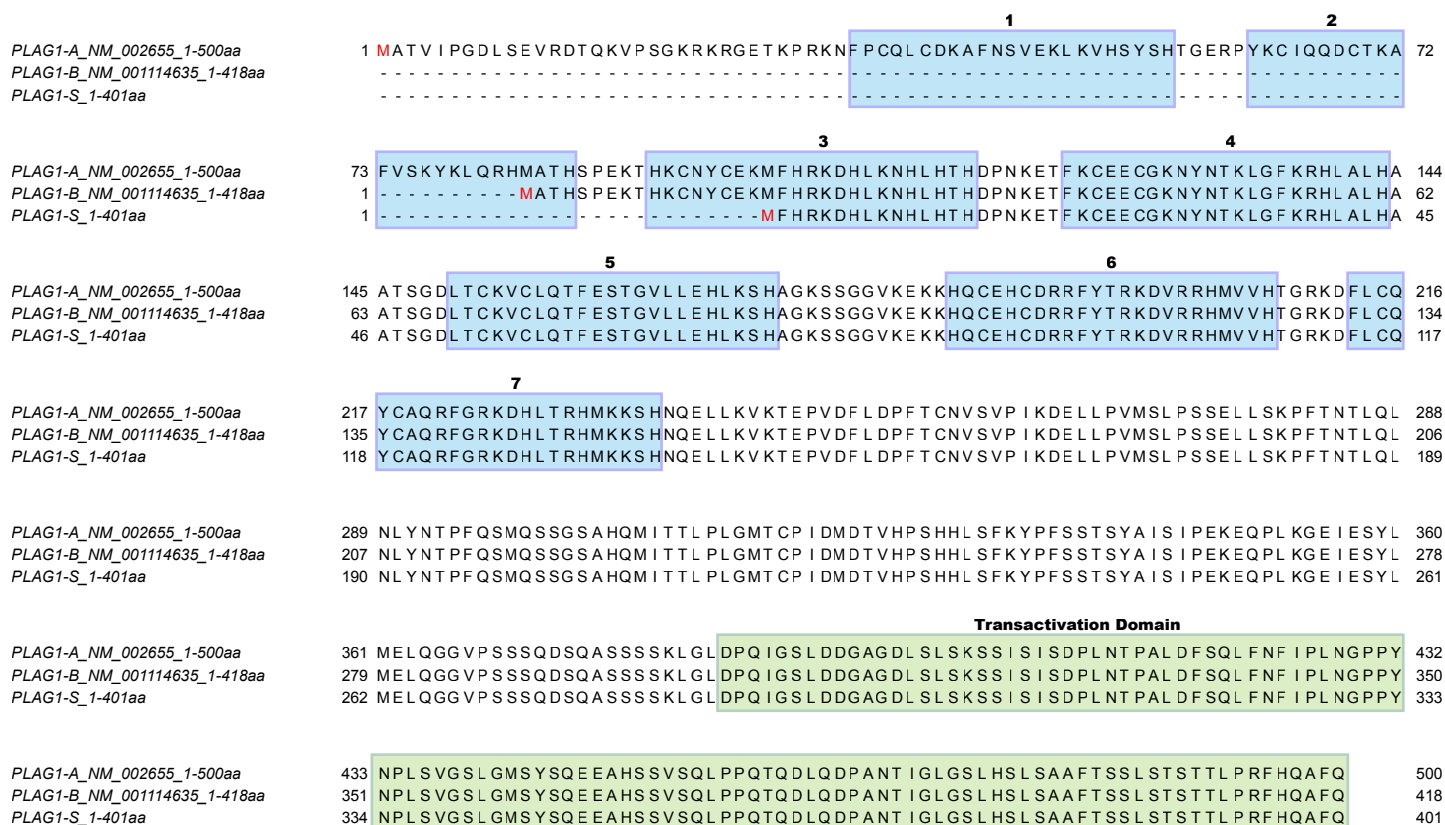

**Figure S1. Sequence alignment of human PLAG1 isoforms. Related to Figure 2.**

Shown is the alignment of the three PLAG1 isoforms and the location and number of Zn finger domains (blue boxes), transactivation domain (green box) and alternative start sites for PLAG1 isoforms (red).

**Figure S2**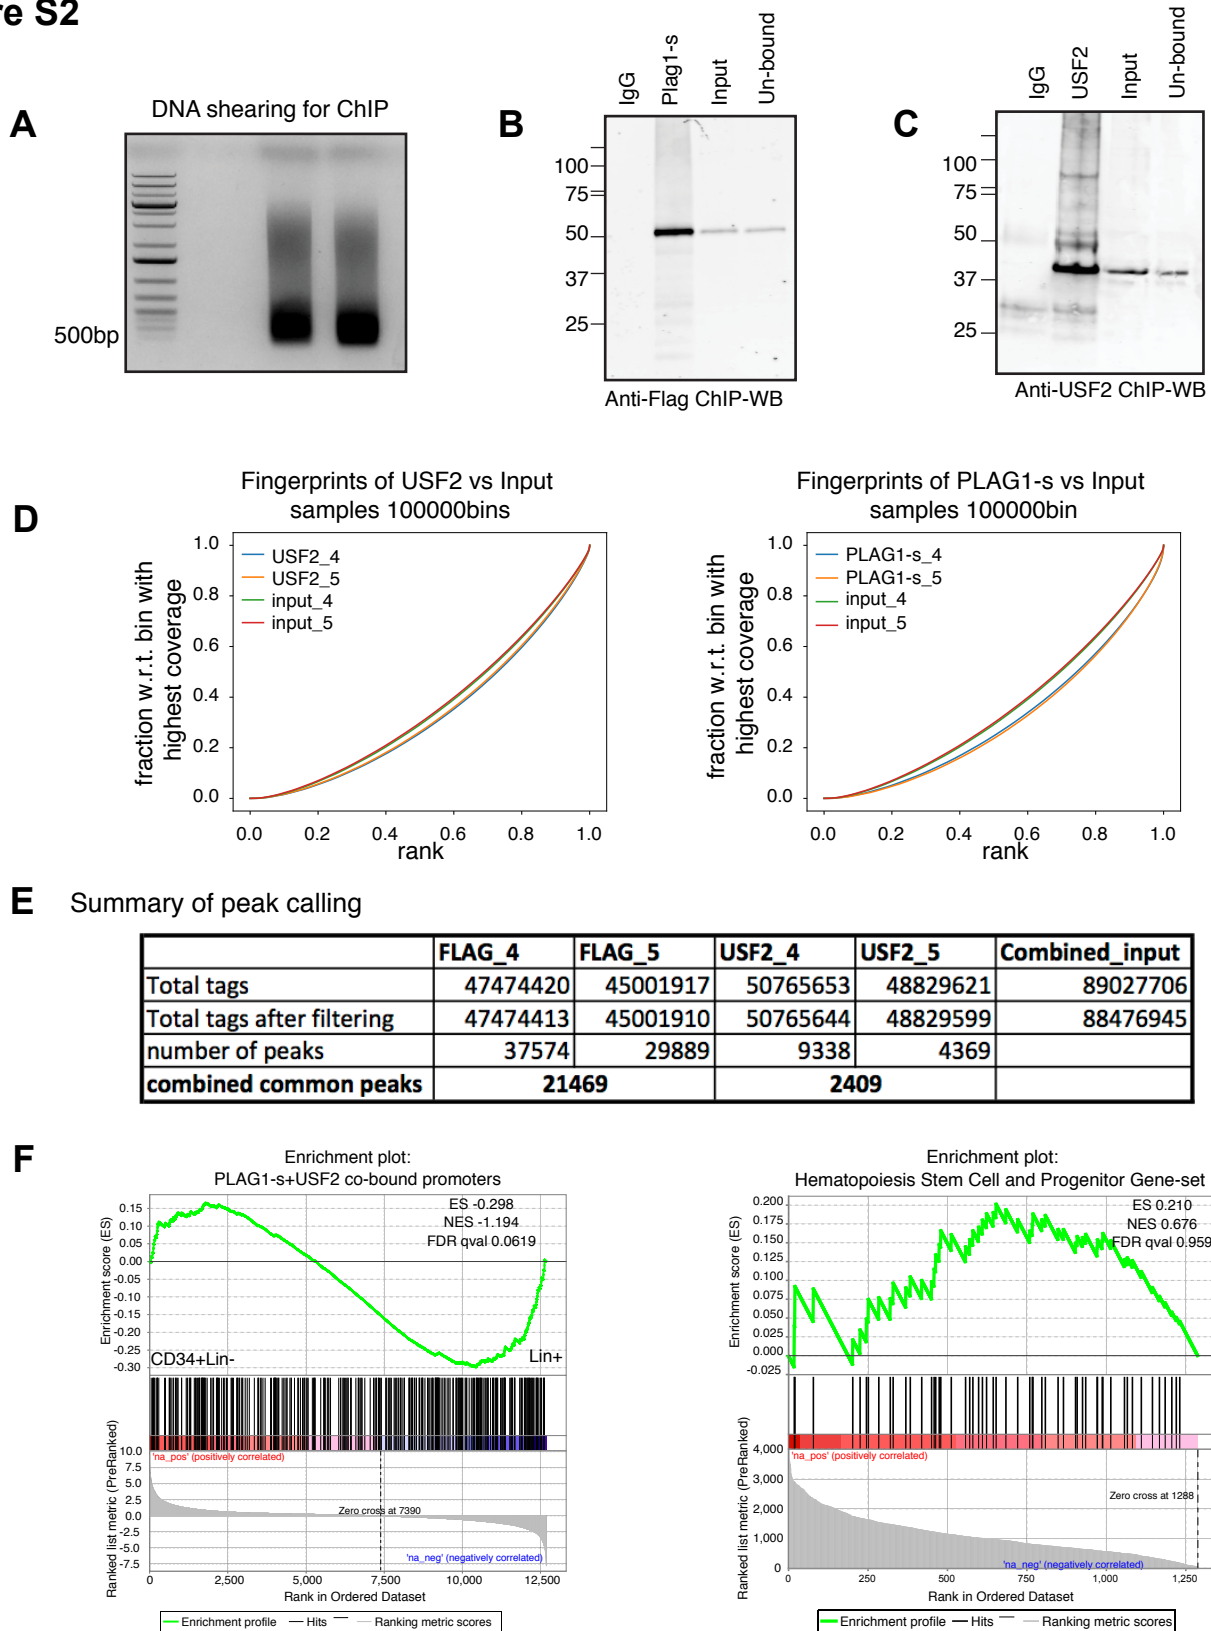**Figure S2. ChIP-seq experiments for PLAG1-s and USF2. Related to Figure 6.**

(A.) Shearing profiles of the chromatin that was immunoprecipitated for ChIP-seq experiments. (B. and C.) ChIP-western blot (ChIP-WB) profiles to assess the efficiency of chromatin pull down prior to sequencing by (B.) anti-Flag antibody for PLAG1-s ChIP and (C.) anti-USF2 antibody for USF2 ChIP. (D.) Fingerprint plots showing the sequencing read coverage distribution across 100,000 randomly selected genomic bins for inputs as well as USF2, and PLAG1-s ChIP samples suggests that PLAG1-s ChIP was more efficient compared to USF2 ChIP (E.) Summary of peak calling for both individual replicates from K562 co-overexpression clones #4 and #5 for PLAG1-s and USF2 ChIP experiments. Peaks that were common to the two replicates (combined common peaks) were used for all downstream analysis. (F.) GSEA for PLAG1-s+USF2 co-occupied promoters against a ranked list of genes based on expression from Lin<sup>-</sup> to Lin<sup>+</sup> populations (left) GSEA for PLAG1-s+USF2 co-occupied sites using the hematopoietic stem/progenitor gene set (right).

**Table S1: Promoter fragment truncation and deletion primer sequences. Related to Figure 1.** Same reverse primer was used in combination with the respective forward primer sequence to generate full length and truncation clones. Underlined are the XhoI and HindIII restriction sites in the forward and reverse sequences, respectively.

| Promoter clone | Forward primer sequence                      | Reverse primer sequence                   |
|----------------|----------------------------------------------|-------------------------------------------|
| -3238-Luc      | CTAGCTAGCT <u>TCGAG</u> ATGGAGAGCAGAAAGGCACG | CTAGCTAGA <u>AAGCTT</u> ATCTGAGCCCCCGCCCC |
| -2251-Luc      | CTAGCTAGCT <u>TCGAG</u> GTGAGTTTGCCACCTCTGAG |                                           |
| -1764-Luc      | CTAGCTAGCT <u>TCGAG</u> GTGAGTTTGCCACCTCTGAG |                                           |
| -1188-Luc      | CTAGCTAGCT <u>TCGAG</u> AGGGGTTTCCTGAAATAACC |                                           |
| -1013-Luc      | CTAGCTAGCT <u>TCGAG</u> CTTTCTCGCCACTGGAATCG |                                           |
| -788-Luc       | CTAGCTAGCT <u>TCGAG</u> CGGGGGCCGCAAAGGAG    |                                           |
| -588-Luc       | CTAGCTAGCT <u>TCGAG</u> GAGGAGCCGCAGCAAGC    |                                           |
| -203-Luc       | CTAGCTAGCT <u>TCGAG</u> TGAGCTAAGCCGAGCCC    |                                           |
| -138-Luc       | CTAGCTAGCT <u>TCGAG</u> ATTCGGAGGAGCCCGG     |                                           |
| d588-203-Luc   | TGAGCTAAGCCGAGCCC                            | ACCCGGACCTGGGAGAAG                        |

**Table S2: Transcription factor binding site mutagenesis primers. Related to Figure 1.**

| Transcription Factor                                  | Predicted Number of Binding Sites | Consensus Binding Sequence   | Substitution                 | Forward Primer                                                                                                                                                                                                                                                                                                                           | Reverse Primer                                                                                                                                                                                                                                                                                                                                                                          |
|-------------------------------------------------------|-----------------------------------|------------------------------|------------------------------|------------------------------------------------------------------------------------------------------------------------------------------------------------------------------------------------------------------------------------------------------------------------------------------------------------------------------------------|-----------------------------------------------------------------------------------------------------------------------------------------------------------------------------------------------------------------------------------------------------------------------------------------------------------------------------------------------------------------------------------------|
| Upstream stimulatory factor-2 (USF2)                  | 3                                 | CANNITG                      | GTNNGA                       | CCGCCCCCGCAGCCTCTGGAATCCAGGGAAGTCGGG<br>TC TAGAATCCCGCCCTCCGACGCCGGGAGGAGGG<br>GAGCTAAGCCGAGCCTCCGGATAGCGGCTCTCGCCG                                                                                                                                                                                                                      | CCCAGTCCCTGGATTCCAGAGGCTCGGGGGGGGG<br>CCCTCTCCCCCGCTCCGAGGCTCCGGAGTTC TAGA<br>CGCGAGAGCCGTCATCCGGAGGCTCGGCTTAGCTC                                                                                                                                                                                                                                                                       |
| Nuclear factor Y-A (NFYA)                             | 1                                 | GGCATTGGTT                   | TCAGCTGTAT                   | GGTGCGTGACGTCACCTCAGCTGTATACACGACGTTTAGAAC                                                                                                                                                                                                                                                                                               | GTTTAGAACGCTGCTGTATACAGCTGAGGTGACGTCACGCGACC                                                                                                                                                                                                                                                                                                                                            |
| cAMP responsive element binding protein (CREB)        | 1                                 | TGACGT                       | TTAAGT                       | CGCAGGGGGTGGGTTAATTTACCGGCAATGGTTACA                                                                                                                                                                                                                                                                                                     | TGTAACCAATGCCGGTAAATTAACGCACCCCCCGTGGC                                                                                                                                                                                                                                                                                                                                                  |
| Glucocorticoid Nuclear Receptor (NR3C1/GRE)           | 1                                 | GTTG                         | GCCC                         | CATTGGTTACACGAGCCCTAGAACCTCCGCCCA                                                                                                                                                                                                                                                                                                        | TGCGGGGCGGAGTTCTAGGGCGTGGTGTAAACCAATG                                                                                                                                                                                                                                                                                                                                                   |
| Microphthalmia-Associated Transcription Factor (MITF) | 1                                 | CATGTG                       | GATATA                       | CCCGCCCCCGGAGCCGATATAATCCAGGGAAGTGGGG                                                                                                                                                                                                                                                                                                    | CCCGACTTCCCTGGATTATATCGGCTGCGGGGGGGGGGG                                                                                                                                                                                                                                                                                                                                                 |
| CCCTC-binding factor (CTCF)                           | 5                                 | GGGG                         | ATATT                        | CCCCGATCCACCCGAATATCCAGCCCATGTGAT<br>GTGGTCCGGCGTGATATCCGAGTGTCCGGCG<br>GTGCGCCCGCGGAGGCATATCCGACATATTTGCGTGACGTCACCGCG<br>GCCGGGGGGGGGGGAATTTGGGTGTGCGAGGCGC                                                                                                                                                                            | ATCATGGGGTGGGAAATTCGGGGTGGATCGGGG<br>CGCGCGCACACTCGGAAATATCAGGGCGCGGACCCAC<br>GGCGGTGACGTACGCAAAATATGCGGGAATATGCTGCCCGCGCGGCAC<br>GCTGCCCTCGACCCAAATATTTCCCGCCCGCCCGG                                                                                                                                                                                                                   |
| PR Domain Containing 5 (PRDM5)                        | 2                                 | AGGG                         | TCTT                         | CGTGCCCGGGGAGGTCITGGAGGAGGAGGGA<br>CGGGGGGGAGGAGTCTTGGAGGAGGCGGA                                                                                                                                                                                                                                                                         | TCTCTCTCTCTCCAAAGACCTCCCGCGCGCACG<br>TCCGCTCCCTCCCAAGACCTCTCCCGCCCGC                                                                                                                                                                                                                                                                                                                    |
| Zinc fingerDNA binding protein 148/89 (ZFP148/ZBP89)  | 10                                | C-rich: CCCC<br>G-rich: GGGG | C-rich: CGGT<br>G-rich: GCCA | CGCCTCCCCTCGGTCATCCACCCCGGTCGCCAGCCCCAT<br>GTCCGGGTGCGCTCGGCTCGCCCTGGCCCGCC<br>CCGGGAGGAGGCCAAGGAGGAGGAGG<br>GGAGAGATGCCATGGGAGGAGGAGGCCAAGAGTGGGGAT<br>GGATGGCCCGGGCCACGGGAGCGGGG<br>CGGAGCGGGCCATGTGCGAGCAGC<br>CCGGCGGGCCAGGAGGAGGCCAAGGAGGAGGG                                                                                       | ATGGGCTGCGGACCGGGGTGGATCGACCGAGGGAGGGG<br>GGGGCAGGGGAGACGAGGACGACCCCGGAC<br>CTCTCTCTCTTGGGCTCTCTCCCGG<br>ATCCCCACCTTTGGCCCTCTCTCCCGCATGCCCCATCTCTCTCC<br>CCCGTCCCGGTGGCCCGCCCGCCATCCG<br>GCTGCCTCGCACATGGCCCGCTCCCGG<br>CGTCCCTCTTGGGCTCTCTCTGCGCCCGCCCGG<br>CCATCTCTCTTACTCATCATCTCCCGGGGGCAC<br>CCCCACCTCTCATTTCCCTCCATACCCCATCTCC<br>CGCTCCCTCATCATCTCTCCATCACCGGGCTATTAGCAATCTCTCTG |
| Pleomorphic adenoma gene 1 (PLG1)                     | 3                                 | GGGG                         | TGAT                         | GGAGATGGGGTATGGAGGAGAAATGAGAGAGTGGGG<br>CAGAGAGATTCGTAATAGCCCGGCGTATGAGGAGGAGGGAGGGAGGGAGCGG<br>AAGCTCCCGGACTCACATACAGATCCACCCTGCC<br>GGGTGCGCTCCACATAGACATGCGCCCTGCC<br>GGAGCGGGTACATACACCCCGGGTTT<br>CCAGTCCCGCTGTATGATGGGAGGAGGAG<br>GGGAGGAGGAGTATATATGGGGATGGG<br>GGGAGGAGGAGTATGATGAGGAGGAGGATC<br>TTTTGGGGTGGGGTGTCTGTGGGGCTCAGAT | GGCGGGTGGATGTATGTAGTGGGGGAGCTT<br>GGCGGGTGGATGTATGTAGTGGGGGAGCTT<br>GACAGCGGGGTATGTAGACCCCGCTCC<br>CTCCCTCCCGCATACAGGGGAGCTGG<br>GGCATCCCCACATACACCTCTCTCTCC<br>GATCTCCGCTCCATACACCTCTCTCC<br>ATCTGAGGCCACAGACACCCCGCCCAAAA                                                                                                                                                             |
| Myc associated zinc finger protein1 (MAZ1)            | 7                                 | GGGAGGNNNN<br>CCCTCCNNNN     | TGTATGNTNT<br>ACATACANANA    |                                                                                                                                                                                                                                                                                                                                          |                                                                                                                                                                                                                                                                                                                                                                                         |

**Table S3. qPR-PCR Primers and Universal Probe Library Number for MSI2 and CYP1B1. Related to Figure 2-5.**

| <b>Gene</b>       | <b>Accession</b> | <b>Primer sequences</b> | <b>Length</b> | <b>Position</b> | <b>Tm</b> | <b>%GC</b> | <b>UPL#</b> |
|-------------------|------------------|-------------------------|---------------|-----------------|-----------|------------|-------------|
| MSI2<br>isoform 1 | NM_138962.2      | ggcagcaagaggatcagg      | 18            | 947 - 964       | 59        | 61         | 26          |
|                   |                  | ccgtagagatcggcgaca      | 18            | 1016 - 1033     | 60        | 61         |             |
| CYP1B1            | NM_000104.3      | acgtaccggccactatcact    | 20            | 1359 - 1378     | 59        | 55         | 20          |
|                   |                  | ctcgagtctgcacatcagga    | 20            | 1450 - 1469     | 60        | 55         |             |

**Table S5: KEGG Pathway Analysis of genes co-bound by PLAG1-S and USF2. Related to Figure 6.**

| ID       | Description                                                | GeneRatio | BgRatio  | pvalue   | p.adjusted | qvalue   | geneID                                                                                                                        | Count |
|----------|------------------------------------------------------------|-----------|----------|----------|------------|----------|-------------------------------------------------------------------------------------------------------------------------------|-------|
| hsa04142 | Lysosome                                                   | 22/436    | 123/7317 | 2.78E-06 | 7.79E-04   | 6.85E-04 | 3916/9114/57192/4758/2548/285362/<br>2799/9179/1509/1201/1508/51606/<br>23062/1200/1497/4074/8722/2629/<br>5538/8905/3425/427 | 22    |
| hsa05120 | Epithelial cell signaling in Helicobacter pylori infection | 15/436    | 68/7317  | 7.94E-06 | 1.11E-03   | 9.78E-04 | 9114/528/5336/8992/9550/529/155066/<br>998/51606/6300/5599/102/4792/6714/<br>3725                                             | 15    |
| hsa04933 | AGE-RAGE signaling pathway in diabetic complications       | 18/436    | 99/7317  | 1.78E-05 | 1.66E-03   | 1.46E-03 | 581/5581/5336/998/6776/5296/1729/596/<br>6300/5599/4893/5054/4846/4088/5594/<br>595/7423/3725                                 | 18    |
| hsa04917 | Prolactin signaling pathway                                | 13/436    | 70/7317  | 2.09E-04 | 1.46E-02   | 1.28E-02 | 8835/2592/6776/5296/6300/5599/25759/<br>4893/5594/2309/595/6714/894                                                           | 13    |
| hsa04721 | Synaptic vesicle cycle                                     | 12/436    | 63/7317  | 2.84E-04 | 1.59E-02   | 1.40E-02 | 9114/528/8992/8775/9550/529/155066/<br>51606/2054/774/5864/594855                                                             | 12    |
| hsa04140 | Autophagy - animal                                         | 18/436    | 128/7317 | 5.39E-04 | 2.15E-02   | 1.89E-02 | 3916/64121/64422/1509/1508/29982/<br>11337/5296/596/5599/4893/10325/<br>55102/5594/55062/22863/9474/54541                     | 18    |
| hsa05110 | Vibrio cholerae infection                                  | 10/436    | 50/7317  | 6.06E-04 | 2.15E-02   | 1.89E-02 | 9114/528/5336/8992/9550/529/155066/<br>51606/60/375                                                                           | 10    |
| hsa04370 | VEGF signaling pathway                                     | 11/436    | 59/7317  | 6.14E-04 | 2.15E-02   | 1.89E-02 | 5336/998/5296/6300/25759/4893/4846/<br>8877/5594/7867/6714                                                                    | 11    |
| hsa04966 | Collecting duct acid secretion                             | 7/436     | 27/7317  | 7.95E-04 | 2.47E-02   | 2.18E-02 | 9114/528/8992/9550/529/155066/10723                                                                                           | 7     |
| hsa04137 | Mitophagy - animal                                         | 11/436    | 65/7317  | 1.42E-03 | 3.62E-02   | 3.18E-02 | 79735/11337/5599/4893/2309/665/9474/55288/<br>6714/51024/3725                                                                 | 11    |
| hsa05131 | Shigellosis                                                | 11/436    | 65/7317  | 1.42E-03 | 3.62E-02   | 3.18E-02 | 998/1729/6300/5599/3688/5594/9474/4792/6714/<br>60/7414                                                                       | 11    |
| hsa04931 | Insulin resistance                                         | 15/436    | 107/7317 | 1.59E-03 | 3.70E-02   | 3.26E-02 | 6945/5581/92579/13352/25296/5599/4846/5106/<br>10891/5770/1374/6720/4792/79660/10999                                          | 15    |

**Table S6: GO Pathway Analysis of genes co-bound by PLAG1-S and USF2. Related to Figure 6.**

| ID         | Description                                           | GeneRatio | BgRatio   | pvalue   | p.adjusted | qvalue   | geneID                                                                                                                                                                                                                                                                                                                                                                               | Count |
|------------|-------------------------------------------------------|-----------|-----------|----------|------------|----------|--------------------------------------------------------------------------------------------------------------------------------------------------------------------------------------------------------------------------------------------------------------------------------------------------------------------------------------------------------------------------------------|-------|
| GO:0006914 | autophagy                                             | 57/983    | 428/16672 | 6.24E-09 | 2.96E-05   | 2.84E-05 | LAMP1/ATP6V0D1/MCOLN1/ULK3/RRAGC1/ATG3/MTDH/TRAPPC8/CTSD/ATP6V1C1/VPS26A/TP6V0E1/ATP6V1G1/RAB3GAP2/TBC1D17/ATP6V1E1/ATP6V0E2/LAMTOR1/CLN3/WDR6/ATP6V1H/NRBF2/VPS37B/VPS11/U2AF2/PIK3R2/BCL2/FBXL2/MTM1/PIP4K2C/MAPK8/GAPDH/VPS33A/VPS16/RNF185/TICAM1/GBA/TPCN1/RRAGB/ATG2B/EXOC1/CDK5R1/LAMTOR4/PIM2/WIP1/PPARGC1A/TG2B/EXOC1/CDK5R1/LAMTOR4/PIM2/WIP1/SREBF1/SPTLC2/NEDD4/FUS1/UBC | 57    |
| GO:0016236 | macroautophagy                                        | 35/983    | 234/16672 | 3.46E-07 | 8.20E-04   | 7.87E-04 | ATP6V0D1/MCOLN1/RRAGC/ATG3/TRAPPC8/ATP6V1C1/VPS26A/ATP6V0E1/ATP6V1G1/RAB3GAP2/ATP6V1E1/ATP6V0E2/LAMTOR1/CLN3/ATP6V1H/MTM1/PIP4K2C/MAPK8/GAPDH/VPS33A/VPS16/GBA/RRAGB/ATG2B/EXOC1/CDK5R1/LAMTOR4/WIP1/BNIP3L/ATG14/ATG5/KIAA1324/SPTLC2/NEDD4/UBC                                                                                                                                     | 35    |
| GO:0010506 | regulation of autophagy                               | 35/983    | 261/16672 | 4.55E-06 | 7.19E-03   | 6.90E-03 | ATP6V0D1/RRAGC/MTDH/ATP6V1C1/VPS26A/ATP6V0E1/ATP6V1G1/RAB3GAP2/ATP6V1E1/ATP6V0E2/CLN3/WDR6/ATP6V1H/NRBF2/U2AF2/PIK3R2/BCL2/FBXL2/MTM1/PIP4K2C/MAPK8/GAPDH/TICAM1/GBA/TPCN1/RRAGB/EXOC1/CDK5R1/PIM2/BNIP3L/ATG14/KIAA1324/SREBF1/SPTLC2/NEDD4                                                                                                                                         | 35    |
| GO:0016241 | regulation of macroautophagy                          | 21/983    | 123/16672 | 9.67E-06 | 1.15E-02   | 1.10E-02 | ATP6V0D1/ATP6V1C1/VPS26A/ATP6V0E1/ATP6V1G1/RAB3GAP2/ATP6V1E1/ATP6V0E2/CLN3/ATP6V1H/MTM1/PIP4K2C/MAPK8/GAPDH/EXOC1/CDK5R1/BNIP3L/KIAA1324/SPTLC2/NEDD4                                                                                                                                                                                                                                | 21    |
| GO:0048511 | rhythmic process                                      | 38/983    | 310/16672 | 1.51E-05 | 1.43E-02   | 1.38E-02 | GBA/EXOC1/CDK5R1/BNIP3L/KIAA1324/SPTLC2/NEDD4/BAX/NR1D2/DYRK1A/VGF/TEF/BHLHE41/HNRNP/D/DBP/NR1D1/SRDS5A1/BCL2/MAPK8/CRY1/RELB/ADNP/HLF/SERPINE1/NOS3/KLF10/CDK5R1/ANG/IMPR1B/CSF2/TIMELESS/DDX5/PER3/FOXO3/PPARGC1A/CP1A/RORA/TOP1/SREBF1/CHRNA7/NR5A1/JUND/MSH4/SOD1/JUN                                                                                                            | 38    |
| GO:0007033 | vacuole organization                                  | 28/983    | 209/16672 | 4.06E-05 | 2.95E-02   | 2.83E-02 | MCOLN1/PDCD8IP/GAA/ATG3/TRAPPC8/ARFGEF2/RAB3GAP2/LAMTOR1/CLN3/HPS1/VPS37B/VPS11/MTM1/PIP4K2C/ITPP1/VPS33A/VPS16/HOOK2/PPT1/ATG2B/WIP11/STX6/P2RX7/ATG14/ATG5/KIAA1324/CLN6/ARF1                                                                                                                                                                                                      | 28    |
| GO:0051452 | intracellular pH reduction                            | 11/983    | 45/16672  | 4.50E-05 | 2.95E-02   | 2.83E-02 | ATP6V0D1/ATP6V1C1/ATP6V0E1/ATP6V1G1/ATP6V1E1/ATP6V0E2/CLN3/ATP6V1H/BCL2/PPT1/CLN6                                                                                                                                                                                                                                                                                                    | 11    |
| GO:0045851 | pH reduction                                          | 11/983    | 46/16672  | 5.60E-05 | 2.95E-02   | 2.83E-02 | ATP6V0D1/ATP6V1C1/ATP6V0E1/ATP6V1G1/ATP6V1E1/ATP6V0E2/CLN3/ATP6V1H/BCL2/PPT1/CLN6                                                                                                                                                                                                                                                                                                    | 11    |
| GO:0048025 | negative regulation of mRNA splicing, via spliceosome | 7/983     | 19/16672  | 6.53E-05 | 2.95E-02   | 2.83E-02 | DYRK1A/U2AF2/PTBP1/SF/SWAP/SRSF6/SRSF7/HNRNPA2B1                                                                                                                                                                                                                                                                                                                                     | 7     |
| GO:0007034 | vacuolar transport                                    | 33/983    | 272/16672 | 6.62E-05 | 2.95E-02   | 2.83E-02 | APZ1/LAMP1/VPS50/AP4M1/MICALL2/TRAPPC8/VPS26A/RAB29/TBC1D17/SPAG9/SNX8/CLN3/SNX2/RAB21/VPS37B/VPS11/MTM1/GPRASP1/VPS33A/M6PR/VPS16/SNX16/HOOK2/MAPK1/SNX9/WIP1/STX6/ATG14/SRCR/HOBNEDD4/ARF1/UBC                                                                                                                                                                                     | 33    |
| GO:0042594 | response to starvation                                | 22/983    | 150/16672 | 6.84E-05 | 2.95E-02   | 2.83E-02 | RRAGC/FNIP1/SLC38A2/HMGCL/UCP2/SRD5A1/BCL2/CAD/COMT/BCAS3/GBA/RRAGB/KLF10/PPARGC1A/SEH1L/ATG14/ATG5/                                                                                                                                                                                                                                                                                 | 22    |



|            |                                               |        |           |          |          |          |                                                                                                                                                                                                                                                                                                                                                                                                        |    |
|------------|-----------------------------------------------|--------|-----------|----------|----------|----------|--------------------------------------------------------------------------------------------------------------------------------------------------------------------------------------------------------------------------------------------------------------------------------------------------------------------------------------------------------------------------------------------------------|----|
| GO:0071417 | cellular response to organonitrogen compound  | 48/983 | 462/16672 | 9.61E-05 | 3.71E-02 | 3.56E-02 | KIAA1324/NUAK2/SREBF1/AACS/JUN<br>ATP6V0D1/SOCS2/IRRAGC/MGARPI/PRKAR2B/ATP6V1C1/ATP6V0E1/<br>ATP6V1G1/APEX1/ATP6V1E1/ATP6V0E2/LAMTOR1/OSBPL8/<br>HNRNPDI/ATP6V1H/PLA2G1B/STAT5A/UCP2/SRD5A1/PIK3R2/<br>RAB31/COL6A1/DIAPH1/DNMT3A/GCLC/AGTRAP/PDK2/KLF15/<br>RRAGB/KLF10/MAPK1/LAMTOR4/KLF4/FER/HDAC5/FOXO3/FGF21/<br>PPARGC1A/BAIAP2L1/CAPN10/PTPN1/COL16A1/SLC34A1/<br>PRKAR1A/SREBF1/PDE2A/SRC/SOD1 | 48 |
| GO:1901652 | response to peptide                           | 45/983 | 425/16672 | 1.02E-04 | 3.71E-02 | 3.56E-02 | ATP6V0D1/SOCS2/MGARPI/PRKAR2B/ATP6V1C1/IVGF/BSG/<br>ATP6V0E1/ATP6V1G1/APEX1/ATP6V1E1/ATP6V0E2/OSBPL8/<br>ATP6V1H/PLA2G1B/STAT5A/UCP2/SRD5A1/PIK3R2/RAB31/GCLC/<br>CAD/AGTRAP/KHK/CRY1/PDK2/KLF15/KLF10/MAPK1/KLF4/FER/<br>CACYBP/HDAC5/FOXO3/FGF21/BAIAP2L1/CAPN10/PTPN1/SLC34A1<br>/PRKAR1A/SREBF1/NFKBIA/SRC/SRSF6/JUND                                                                              | 45 |
| GO:1901653 | cellular response to peptide                  | 35/983 | 304/16672 | 1.17E-04 | 3.97E-02 | 3.81E-02 | ATP6V0D1/SOCS2/MGARPI/PRKAR2B/ATP6V1C1/ATP6V0E1/<br>ATP6V1G1/APEX1/ATP6V1E1/ATP6V0E2/OSBPL8/ATP6V1H/<br>PLA2G1B/STAT5A/UCP2/SRD5A1/PIK3R2/RAB31/GCLC/AGTRAP/<br>PDK2/KLF15/KLF10/MAPK1/KLF4/FER/HDAC5/FOXO3/FGF21/<br>BAIAP2L1/CAPN10/PTPN1/PRKAR1A/SREBF1/SRC                                                                                                                                         | 35 |
| GO:0008333 | endosome to lysosome transport                | 10/983 | 42/16672  | 1.26E-04 | 4.00E-02 | 3.84E-02 | VPS11/MTM1/GPRASP1/VPS33A/M6PR/VPS16/SNX16/HOOK2/<br>ATG14/RHOB                                                                                                                                                                                                                                                                                                                                        | 10 |
| GO:1903312 | negative regulation of mRNA metabolic process | 9/983  | 35/16672  | 1.46E-04 | 4.32E-02 | 4.14E-02 | DYRK1A/U2AF2/PTBP1/CCNT1/SFSWAP/SRSF6/SRSF7/TOB1/<br>HNRNPA2B1                                                                                                                                                                                                                                                                                                                                         | 9  |
| GO:0000082 | G1/S transition of mitotic cell cycle         | 28/983 | 227/16672 | 1.74E-04 | 4.53E-02 | 4.35E-02 | BAX/CACUL1/HINFP/CDK7/APEX1/EIF4E/BCL2/NACC2/<br>GSPT1/PRMT1/RPA1/ITGB1/MEPCE/JADE1/KANK2/PIM2/<br>PLK5/CNOT4/CCNE1/CCND1/CUL4B/CDC25C/MCM5/MCM2/<br>CTDSP2/CCND2/PLAGL1/UBC                                                                                                                                                                                                                           | 28 |
| GO:0007040 | lysosome organization                         | 11/983 | 52/16672  | 1.83E-04 | 4.53E-02 | 4.35E-02 | GAALAMTOR1/CLN3/HPS1/VPS11/TPP1/HOOK2/PPT1/P2RX7/CLN6/<br>ARF1                                                                                                                                                                                                                                                                                                                                         | 11 |
| GO:0080171 | lytic vacuole organization                    | 11/983 | 52/16672  | 1.83E-04 | 4.53E-02 | 4.35E-02 | GAALAMTOR1/CLN3/HPS1/VPS11/TPP1/HOOK2/PPT1/P2RX7/CLN6/<br>ARF1                                                                                                                                                                                                                                                                                                                                         | 11 |
| GO:0007035 | vacuolar acidification                        | 6/983  | 16/16672  | 1.99E-04 | 4.53E-02 | 4.35E-02 | ATP6V0E1/ATP6V0E2/CLN3/ATP6V1H/PTT1/CLN6                                                                                                                                                                                                                                                                                                                                                               | 6  |
| GO:0050686 | negative regulation of mRNA processing        | 8/983  | 29/16672  | 2.00E-04 | 4.53E-02 | 4.35E-02 | ATP6V0E1/ATP6V0E2/CLN3/ATP6V1H/PTT1/CLN6                                                                                                                                                                                                                                                                                                                                                               | 8  |

**Table S7: Reactome GSEA of genes co-bound by PLAG1-S and USF2. Related to Figure 6.**

| NAME                                                | SIZE | ES         | NES       | NOM p-val   | FDR q-val   | FWER p-val | RANK AT MAX | LEADING EDGE                         |
|-----------------------------------------------------|------|------------|-----------|-------------|-------------|------------|-------------|--------------------------------------|
| REACTOME_CELL_CYCLE                                 | 25   | 0.69933075 | 1.444864  | 0           | 0.092173874 | 0.088      | 257         | tags=36%,<br>list=20%,<br>signal=44% |
| REACTOME_TRANSMEMBRANE_TRANSPORT_OF_SMALL_MOLECULES | 37   | 0.6706475  | 1.4014298 | 0.002       | 0.11639127  | 0.196      | 176         | tags=32%,<br>list=14%,<br>signal=36% |
| REACTOME_CELL_CYCLE_MITOTIC                         | 20   | 0.6407614  | 1.2703049 | 0.07214429  | 0.503188    | 0.78       | 257         | tags=35%,<br>list=20%,<br>signal=43% |
| REACTOME_MRNA_PROCESSING                            | 22   | 0.6112415  | 1.2238253 | 0.118236475 | 0.6260868   | 0.924      | 319         | tags=41%,<br>list=25%,<br>signal=53% |
| REACTOME_HIV_INFECTION                              | 19   | 0.605965   | 1.2200736 | 0.125       | 0.51733893  | 0.934      | 309         | tags=47%,<br>list=24%,<br>signal=61% |
| REACTOME_METABOLISM_OF_PROTEINS                     | 37   | 0.5639318  | 1.1745437 | 0.12825651  | 0.6692175   | 0.99       | 343         | tags=41%,<br>list=27%,<br>signal=54% |
| REACTOME_METABOLISM_OF_CARBOHYDRATES                | 17   | 0.56408656 | 1.122007  | 0.27108434  | 0.8701489   | 1          | 180         | tags=29%,<br>list=14%,<br>signal=34% |
| REACTOME_SLC_MEDIATED_TRANSMEMBRANE_TRANSPORT       | 24   | 0.5438985  | 1.106202  | 0.284       | 0.8493914   | 1          | 144         | tags=21%,<br>list=11%,<br>signal=23% |
| REACTOME_PHOSPHOLIPID_METABOLISM                    | 18   | 0.5415519  | 1.0580957 | 0.4084507   | 1           | 1          | 390         | tags=44%,<br>list=30%,<br>signal=63% |
| REACTOME_GENERIC_TRANSCRIPTION_PATHWAY              | 16   | 0.5298262  | 1.0539083 | 0.4248497   | 0.95460856  | 1          | 305         | tags=31%,<br>list=24%,<br>signal=40% |
| REACTOME_METABOLISM_OF_LIPIDS_AND_LIPOPROTEINS      | 39   | 0.49715915 | 1.0450431 | 0.388       | 0.91145444  | 1          | 390         | tags=41%,<br>list=30%,<br>signal=57% |
| REACTOME_TRANSCRIPTION                              | 18   | 0.52930707 | 1.0423437 | 0.40480962  | 0.8432317   | 1          | 394         | tags=33%,<br>list=31%,<br>signal=47% |

|                                                          |    |            |            |            |            |   |     |                                 |
|----------------------------------------------------------|----|------------|------------|------------|------------|---|-----|---------------------------------|
| REACTOME_PLATELET_ACTIVATION_SIGNALING_AND_AGGREGATION   | 15 | 0.5285818  | 1.0418788  | 0.42566192 | 0.77960515 | 1 | 330 | tags=27%, list=26%, signal=35%  |
| REACTOME_ADAPTIVE_IMMUNE_SYSTEM                          | 26 | 0.513643   | 1.0310123  | 0.452      | 0.76632285 | 1 | 344 | tags=38%, list=27%, signal=51%  |
| REACTOME_PROCESSING_OF_CAPPED_INTRON_CONTAINING_PRE_MRNA | 19 | 0.5146221  | 1.0180796  | 0.49       | 0.75990134 | 1 | 319 | tags=32%, list=25%, signal=41%  |
| REACTOME_HEMOSTASIS                                      | 31 | 0.43617668 | 0.9102693  | 0.726      | 1          | 1 | 353 | tags=26%, list=27%, signal=35%  |
| REACTOME_SIGNALING_BY_GPCR                               | 23 | 0.4300659  | 0.8785485  | 0.73547095 | 1          | 1 | 330 | tags=26%, list=26%, signal=34%  |
| REACTOME_IMMUNE_SYSTEM                                   | 53 | 0.399912   | 0.85586494 | 0.888      | 1          | 1 | 570 | tags=47%, list=44%, signal=81%  |
| REACTOME_SIGNALING_BY_NGF                                | 20 | 0.42523456 | 0.85515    | 0.7755511  | 1          | 1 | 570 | tags=55%, list=44%, signal=97%  |
| REACTOME_MRNA_SPLICING                                   | 16 | 0.4288823  | 0.84179723 | 0.77911645 | 0.9739479  | 1 | 319 | tags=25%, list=25%, signal=33%  |
| REACTOME_GPCR_DOWNSTREAM_SIGNALING                       | 18 | 0.41564652 | 0.81756485 | 0.8266129  | 0.9627115  | 1 | 330 | tags=28%, list=26%, signal=37%  |
| REACTOME_INNATE_IMMUNE_SYSTEM                            | 21 | 0.30153662 | 0.60955846 | 0.9839357  | 1          | 1 | 747 | tags=57%, list=58%, signal=134% |
| REACTOME_DEVELOPMENTAL_BIOLOGY                           | 24 | 0.27081522 | 0.54898703 | 0.986      | 1          | 1 | 869 | tags=71%, list=67%, signal=214% |
| REACTOME_NEURONAL_SYSTEM                                 | 15 | 0.26906207 | 0.526231   | 0.9919355  | 0.993899   | 1 | 712 | tags=47%, list=55%, signal=103% |

## **Supplemental Experimental Procedures**

### **Co-Immunoprecipitation**

1x10<sup>7</sup> Cells were lysed in RIPA buffer containing protease inhibitors and incubated with rotation overnight at 4°C with 2µg anti-USF2 (SantaCruz, #sc-293443) or anti-mouse IgG (SantaCruz) and Protein G dynabeads. The precipitated complex was washed with RIPA buffer and coimmunoprecipitated proteins were eluted in 2x SDS Loading buffer and analyzed by Western Blot. Similar experiments were performed with 1% PFA cross-linked cells and anti-Flag (Sigma, F1804).

### **Chromatin Immunoprecipitation (ChIP)**

ChIP-qPCR was done as per Carey et al with slight modifications (Carey et al., 2009). Briefly, cells were cross-linked, lysed and nuclei subjected to M220 focused-ultrasonicator (Covaris) to generate sheared chromatin fragments of ~500 bp. 5µg anti-USF2 (SantaCruz, #sc-862), anti-PLAG1 (GenTex, # GTX124217) or anti-rabbit IgG (SantaCruz) were added per 1000µL of IP volume followed by precipitation of chromatin-antibody complex by Protein G dynabeads (Invitrogen). Immunoprecipitated DNA was extracted using phenol/chloroform, quantified and subjected to qPCR. Primers and probes were designed by the Universal Probe Library (UPL) probe finder tool (Roche) using input sequence comprising 588 bp upstream of the MSI2 TSS. For the promoter region we used UPL probe #63 and forward and reverse primers as follows: CGCTCGCAGAGAGATTCG; GAGATCTCCGCTCCCTCCT. ChIP fold enrichment was calculated using the 2<sup>-ΔΔCt</sup> method (Schmittgen and Livak, 2008).

For ChIP-seq, 1x10<sup>8</sup> cells K562 cells co-overexpressing Flag-PLAG1-S and USF2 were cross-linked in 1% PFA and excess PFA was washed with glycine, cells were lysed in

RIPA buffer (50mM Tris-Cl pH7.45, 150mM NaCl, 0.1% SDS, 2% NP-40, 1% Sodium deoxycholate) containing protease inhibitors and nuclei were subjected to probe sonication. Two percent of each sample was used for Input sequencing. Chromatin was diluted in dilution buffer (50mM Tris-Cl pH7.45, 150mM NaCl) to get a final SDS concentration of 0.025% to assist in immunoprecipitation (IP). Twenty µg anti-USF2 (SantaCruz, #sc-293443) or anti-Flag (Sigma, F1804) and Protein G dynabeads were used for IP. The precipitated complex was washed in low (50mM Tris-Cl, pH 7.45, 250mM NaCl, 2mM EDTA, 0.1%SDS w/v, 1% Triton X-100 v/v) and high salt buffer (same as low salt buffer except use 500mM NaCl) and chromatin was eluted in TE buffer at 65°C before reverse cross-linking with Proteinase K (NEB, P8107S). Sequencing libraries were prepared using NEBNext<sup>®</sup> Ultra<sup>™</sup> II DNA Library Prep Kit for Illumina<sup>®</sup> (NEB, E7645S) and sequencing as 50 bps single ended reads was performed on Illumina HiSeq 1500 at a depth of 55 million reads per input and 42.5 million reads per IP.

### **ChIP-seq analysis**

Sequencing reads were quality controlled using fastQC, and the adaptors were removed using cutadapt software using the illumina universal primer sequence AGATCGGAAGAGCACACGTCTGAACTCCAGTCAC. The reads were aligned to human genome assembly GRCh38 using hisat2 aligner (version hisat2-2.0.4) (Kim et al., 2015) and duplicates were removed using samtools (Li et al., 2009). Fingerprint plots were generated using deepTools (Ramirez et al., 2016) to check efficiency of the ChIP experiments. Samtools merge was used to merge the input files to create a

master background files, and MACS2 (Feng et al., 2011) was used to called peaks from the individual ChIP replicates using the merged input files. The following peak calling parameters were used:

```
macs2 callpeak -t ChIP_file1.bam -c Input_merged.bam -f BAM -g hs -n  
ChIP_file1_peaks -B -s 50 --bw 150 -q 0.01 --outdir
```

Since the IP efficiency was lower for USF2 the peaks were called using the following less stringent parameters:

```
macs2 callpeak -t USF2_ChIP_file1.bam -c Input_merged.bam -f BAM -g hs -n  
ChIP_file1_peaks -B -s 50 --bw 150 -q 0.05 -m 2 50 --outdir
```

Bedtools intersect (Quinlan and Hall, 2010) was used to identify peaks common to the two replicates and were used for all downstream analysis. Peak files were annotated using HOMER (Heinz et al., 2010) annotatepeaks.pl script using hg38 as the background. HOMER's mergepeaks function was used to identify PLAG1-S and USF2 co-bound targets within 100bps from each other. findMotifsGenome.pl was used for motif analysis with the following parameters -size 200 -mask. Motif distribution profiles were generated using the HOMER function annotatePeaks.pl with the USF2 consensus motif file and the second G-rich region identified as being the PLAG1-S consensus. The R-packages ChIPSeeker (Yu et al., 2015), and clusterProfiler (Yu et al., 2012) were used to perform peak distribution and pathway analysis. Significance of any enriched pathways and GO processes was addressed by setting adjusted pvalueCutoff to 0.05, and by adjusting the p-values using Benjamini & Hochberg (BH) method that is built into the clusterProfiler package. Gene-set enrichment analyses were performed using the GSEA tool with 500-1500 permutations.

### **Cord blood CD34<sup>+</sup> cell isolation, lentiviral transduction and *in vitro* culture**

FACS isolated Lin<sup>-</sup> CD34<sup>+</sup> cells were prestimulated for 8-12 hours in StemSpan medium (StemCell Technologies) supplemented with growth factors Interleukin 6 (IL-6; 20 ng/ml, Peprotech), Stem cell factor (SCF; 100 ng/ml, R&D Systems), Flt3 ligand (FLT3-L; 100 ng/ml, R&D Systems) and Thrombopoietin (TPO; 20 ng/ml, Peprotech). Cells were transduced at an MOI of 50-100 with pSMALB lentiviral particles encoding 3xFLAG-PLAG1-p2A-USF2 (PLAG1+USF2) or firefly luciferase (Vector). BFP<sup>+</sup> cells were purified using a MoFlo XDP (Beckman Coulter) 72hrs post-transduction. For *in vitro* culture, cells were seeded at a density of  $1 \times 10^5$  cells/ml in IMDM 10% FBS supplemented with IL-6 (10 ng/ml), SCF (50 ng/ml), FLT3-L (50 ng/ml), and TPO (20 ng/ml) and counted and analyzed by flow cytometry for CD34 positivity at day 3 and 7. Flow cytometry data was analyzed by Flowjo (Tree star). Immunocytochemistry staining, imaging and analysis for MSI2 and CYP1B1 protein levels was done as previously reported (Rentas et al., 2016).

### **Statistical analysis**

All statistical analyses were performed using PRISM (Graphpad software, Inc). Where appropriate statistical significance was estimated using non-parametric two-tailed t-test for pairwise comparisons or 1-way ANOVA multiple comparisons of control and test transfections/transductions. Data shown as mean  $\pm$ SEM. \*  $p < 0.05$ , \*\*  $p < 0.01$ , \*\*\*  $p < 0.001$

## Supplemental References

- Carey, M.F., C.L. Peterson, and S.T. Smale. 2009. Chromatin immunoprecipitation (ChIP). *Cold Spring Harbor protocols* 2009:pdb prot5279.
- Feng, J., T. Liu, and Y. Zhang. 2011. Using MACS to identify peaks from ChIP-Seq data. *Curr Protoc Bioinformatics* Chapter 2:Unit 2 14.
- Heinz, S., C. Benner, N. Spann, E. Bertolino, Y.C. Lin, P. Laslo, J.X. Cheng, C. Murre, H. Singh, and C.K. Glass. 2010. Simple combinations of lineage-determining transcription factors prime cis-regulatory elements required for macrophage and B cell identities. *Mol Cell* 38:576-589.
- Kim, D., B. Langmead, and S.L. Salzberg. 2015. HISAT: a fast spliced aligner with low memory requirements. *Nat Methods* 12:357-360.
- Li, H., B. Handsaker, A. Wysoker, T. Fennell, J. Ruan, N. Homer, G. Marth, G. Abecasis, R. Durbin, and S. Genome Project Data Processing. 2009. The Sequence Alignment/Map format and SAMtools. *Bioinformatics* 25:2078-2079.
- Quinlan, A.R., and I.M. Hall. 2010. BEDTools: a flexible suite of utilities for comparing genomic features. *Bioinformatics* 26:841-842.
- Ramirez, F., D.P. Ryan, B. Gruning, V. Bhardwaj, F. Kilpert, A.S. Richter, S. Heyne, F. Dundar, and T. Manke. 2016. deepTools2: a next generation web server for deep-sequencing data analysis. *Nucleic acids research* 44:W160-165.
- Rentas, S., N.T. Holzapfel, M.S. Belew, G.A. Pratt, V. Voisin, B.T. Wilhelm, G.D. Bader, G.W. Yeo, and K.J. Hope. 2016. Musashi-2 attenuates AHR signalling to expand human haematopoietic stem cells. *Nature* 532:508-511.
- Schmittgen, T.D., and K.J. Livak. 2008. Analyzing real-time PCR data by the comparative C(T) method. *Nature protocols* 3:1101-1108.
- Yu, G., L.G. Wang, Y. Han, and Q.Y. He. 2012. clusterProfiler: an R package for comparing biological themes among gene clusters. *OMICS* 16:284-287.
- Yu, G., L.G. Wang, and Q.Y. He. 2015. ChIPseeker: an R/Bioconductor package for ChIP peak annotation, comparison and visualization. *Bioinformatics* 31:2382-2383.
